# Supplementary material
Source: Springer Nature journal article supplement (https://www.springermedizin.de/resource/supplementary/12895_2013_155_MOESM2_ESM.pdf/9514232)
Supplement: MOESM2 [file 9514232]

Responded to the questionnaire in 1995.  
Searched for participation in 2008  
N=2572  
female = 1314 (51%), male = 1258 (49%)

Unreachable  
N=169 (7%)

Invited to participate  
N=2403 (93%)  
female =1235 (52%), male =1168 (48%)

Non-respondents  
N = 887 (37%)

Respondents  
N=1516 (63%)  
female =857 (57%), male =659 (43%)
